# Supplementary material
Source: PubMed Central journal article supplement (PMC2973868)
Supplement: 1009803107_pnas.201009803SI.pdf [file 1009803107_pnas.201009803SI.pdf]

# Supporting Information

Shin et al. 10.1073/pnas.1009803107

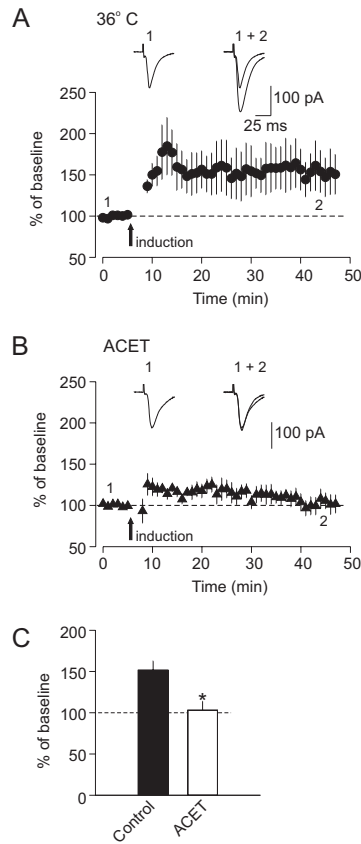

**Fig. S1.** Presynaptic long-term potentiation ("pre-LTP") in thalamic input could be induced at physiological temperatures and blocked by the glutamate receptor (GluR5)-specific antagonist (S)-1-(2-Amino-2-carboxyethyl)-3-(2-carboxy-5-phenylthiophene-3-yl-methyl)-5-methylpyrimidine-2,4-dione (ACET). (A) Normal pre-LTP at thalamo-amygdala synapses was observed at 35–36 °C ( $n = 6$ ). The magnitudes of pre-LTP at 35–36 °C and room temperature were not significantly different ( $P = 0.9$ ). (Insets) Averaged excitatory postsynaptic currents (EPSCs) before (1) and after (2) the induction of LTP. (B) Pre-LTP in thalamic input was blocked in the presence of the specific antagonist of GluR5 subunit-containing kainate receptors ACET (0.5 μM;  $n = 4$ ,  $P = 0.8$  vs. baseline). (Insets) Averaged EPSCs before (1) and after (2) the delivery of LTP-inducing stimulation. (C) Summary graph of LTP experiments: control ( $n = 8$ , same data as in Fig. 1H); ACET (0.5 μM) ( $n = 4$ ,  $P = 0.01$  vs. control LTP). Error bars indicate SEM.



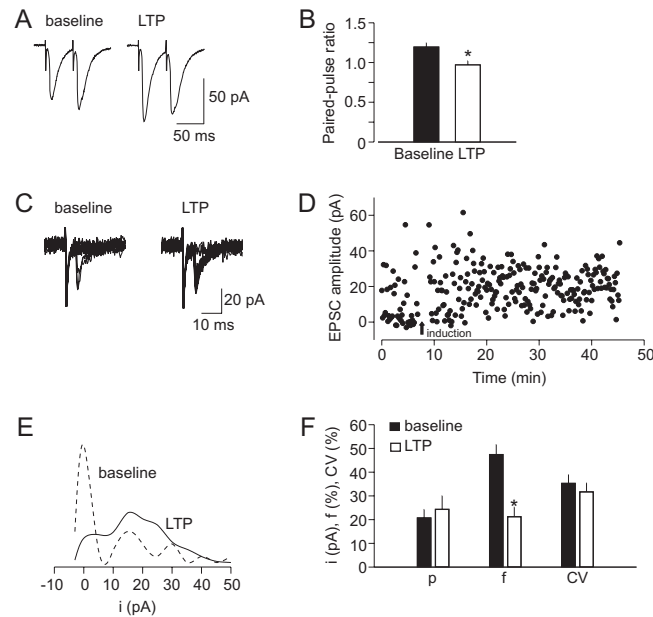

**Fig. S5.** The form of LTP in thalamic input (induced without postsynaptic depolarization) is presynaptically expressed. (A) Paired-pulse facilitation (PPF) assayed with 50-ms interpulse interval before (*Left*) and after (*Right*) the induction of LTP. (B) Summary PPF data ( $n = 8$ ;  $P < 0.01$  for LTP vs. baseline). (C) Superimposed successive EPSCs evoked with minimal stimulation in thalamic input under baseline conditions (*Left*) and after the induction of LTP (*Right*). (D) Amplitude of individual EPSCs during the course of LTP experiment. The LTP induction protocol was delivered at the arrow. The unitary EPSCs were evoked one time every 6 s. (E) Superimposed density estimate plots of unitary EPSCs recorded before and after the induction of LTP. (F) Summary plots for EPSC data before and after LTP was induced ( $n = 7$ ; p, potency; paired  $t$  test,  $P = 0.25$  for LTP vs. baseline; f, fraction of failures; paired  $t$  test,  $P < 0.01$  for LTP vs. baseline; CV, coefficient of variation of EPSC successes;  $P = 0.51$  for LTP vs. baseline).

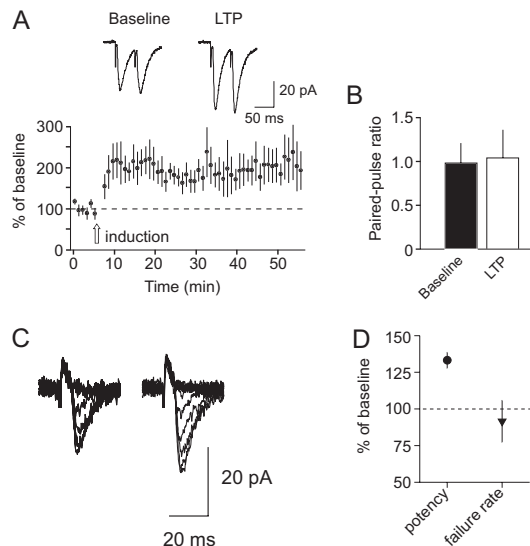

**Fig. S6.** LTP in thalamic input, induced by pairing of presynaptic stimulation with postsynaptic depolarization, is postsynaptically expressed. (A) LTP in thalamic input induced by the delivery of 240 paired presynaptic pulses (50-ms interpulse interval) at 2 Hz frequency at a holding potential of +30 mV ( $n = 7$ ;  $P = 0.0048$  vs. baseline at 30 min postinduction). (*Insets*) Averaged paired EPSCs (50-ms interpulse interval) before (*Left*) and after (*Right*) the induction of LTP. (B) Summary of PPF data. PPF values obtained during baseline recording were not different from PPF values after the induction of LTP ( $n = 7$ ; paired  $t$  test,  $P = 0.43$ ). (C) Superimposed EPSCs evoked with minimal stimulation in thalamic input under baseline conditions (*Left*) and after the induction of LTP with the same protocol as in A. The unitary EPSCs were evoked one time every 6 s. (D) Summary plots for the unitary EPSC data before and after LTP were induced are expressed as the percentage change relative to the baseline value ( $n = 8$ ). The increase in potency (p) after the induction of LTP was highly significant (paired  $t$  test,  $P = 0.001$  for LTP vs. baseline), whereas the failure rate (f) remained unchanged (paired  $t$  test,  $P = 0.3$  for LTP vs. baseline). Data points show mean  $\pm$  SEM. This confirms that the expression of LTP in thalamic input, induced by pairing of low-frequency presynaptic stimulation and postsynaptic depolarization, might be postsynaptic, because it was not associated with increases in probability of release.
